# Supplementary material for: Therapeutic B-cell depletion reverses progression of Alzheimer’s disease
Source: PubMed Central journal article supplement (PMC8042032; doi:10.1038/s41467-021-22479-4), 2021-04-12
Supplement: 41467_2021_22479_MOESM1_ESM.pdf [file 41467_2021_22479_MOESM1_ESM.pdf]

## **Supplementary Information**

### **Therapeutic B-cell Depletion Reverses Progression of Alzheimer's Disease**

Ki Kim, Xin Wang, Emeline Ragonnaud, Monica Bodogai, Tomer Illouz, Marisa DeLuca, Ross A. McDevitt, Fedor Gusev, Eitan Okun, Evgeny Rogaev, and Arya Biragyn

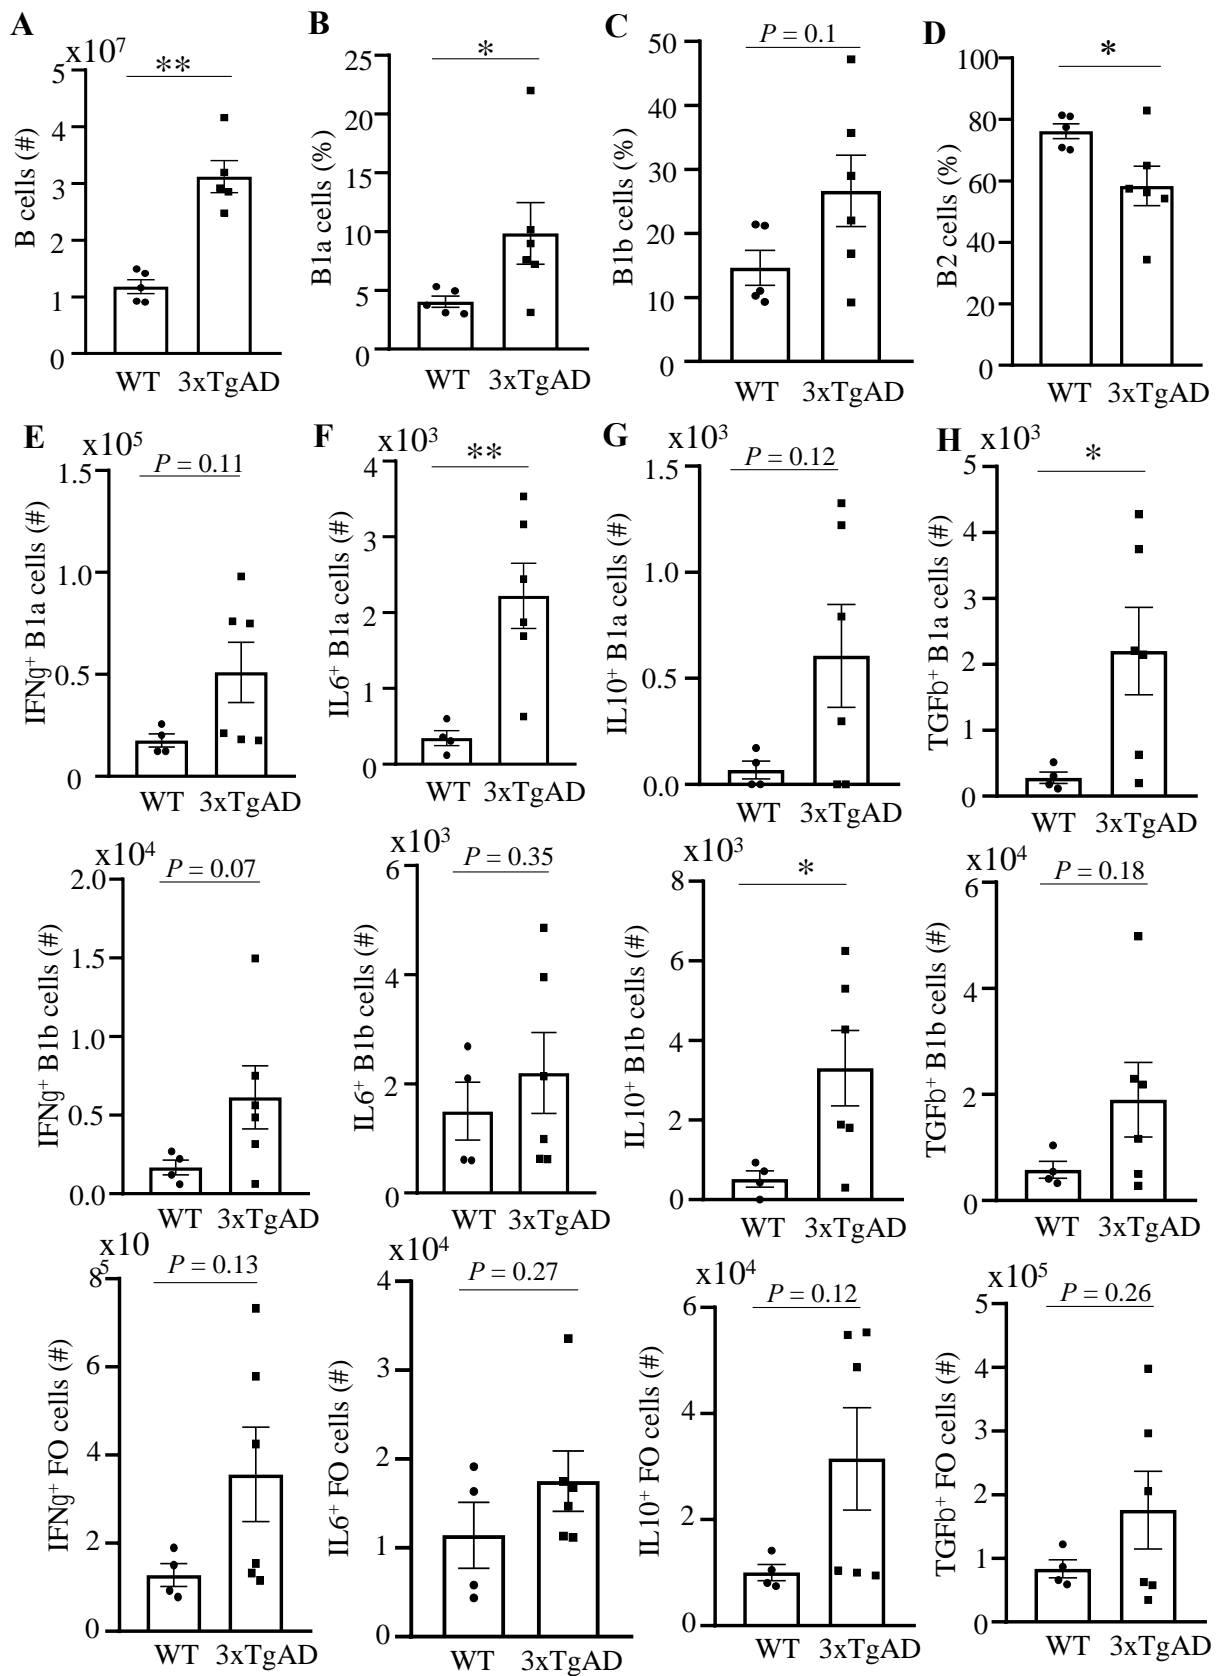

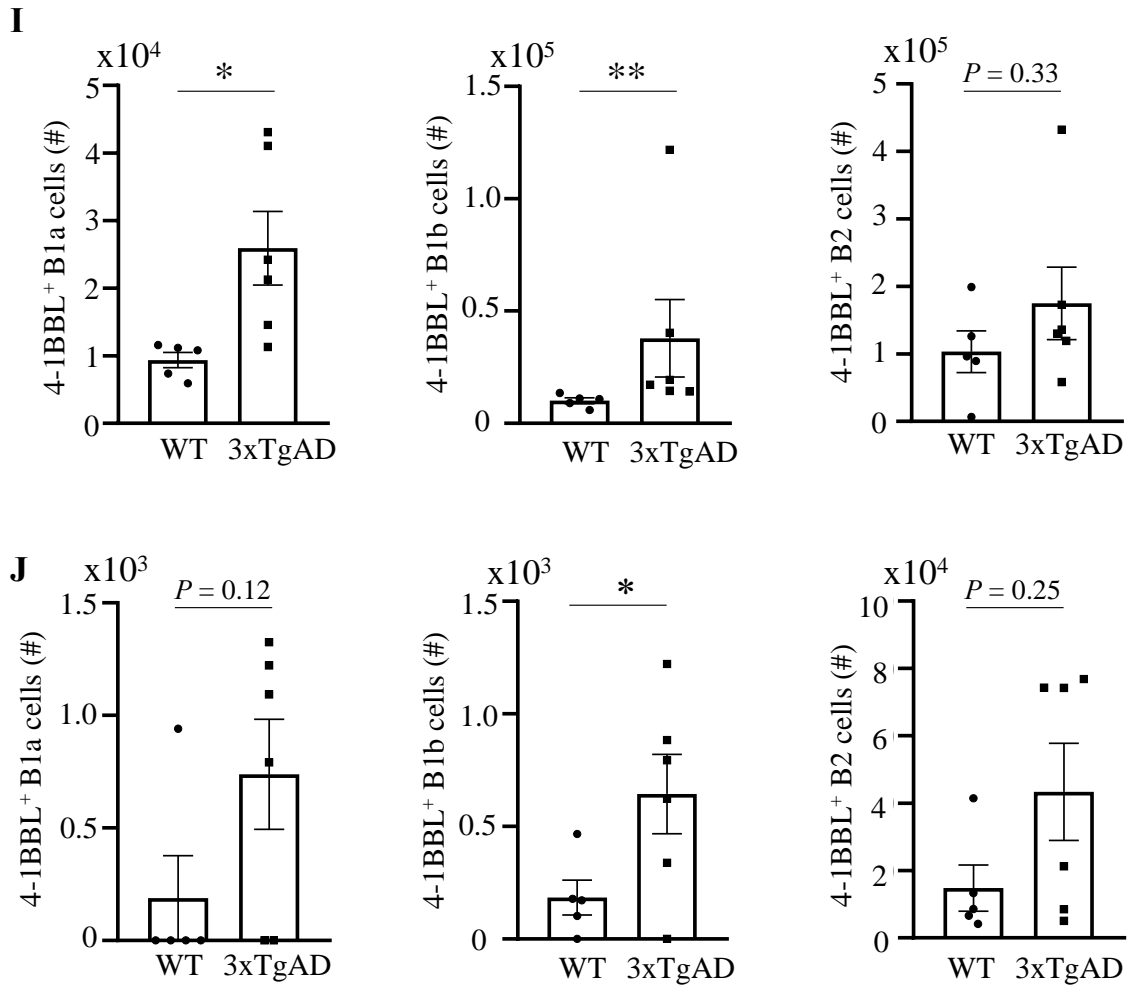

**Supplementary Figure 1. 3xTgAD mice increase activated B1 cells.** Compared with congenic, age- and sex-matched WT mice, 3xTgAD mice increased CD19<sup>+</sup> B cells (**A**) and innate B1 cells (B1a, CD5<sup>+</sup>CD11b<sup>+</sup>CD19<sup>+</sup>; and B1b cells, CD5<sup>-</sup>CD11b<sup>+</sup>CD19<sup>+</sup> in CLN, **B** and **C**) but decreased conventional B2 cells (CD5<sup>-</sup>CD11b<sup>-</sup>CD19<sup>+</sup>, **D**). The 3xTgAD mouse B cells, such as B1a (top panel), B1b (middle panel) and follicular B cells (FO, bottom panel, **E-G**), showed activated phenotype, as they upregulated expression of IFN $\gamma$  (**E**), IL-6 (**F**), IL-10 (**G**) and TGF $\beta$  (**H**) in the cervical lymph nodes (CLN) as compared to WT mice. The AD markedly increased 4-1BBL<sup>+</sup> B1a, 4-1BBL<sup>+</sup> B1b and 4-1BBL<sup>+</sup> B2 cells in the spleen (**I**) and cervical lymph nodes (**J**). Shown is Mean  $\pm$  SEM of cell numbers (**A**, **E-J**) and frequency (**B-D**) in spleen (**A-D** and **I**) and CLN (**E-H** and **J**), where each symbol is for a single mouse, n=4-6. Gating strategy is shown in Suppl. Fig. 9A. \*  $P < 0.05$ ; \*\*  $P < 0.01$ ; \*\*\*  $P < 0.001$  in unpaired  $t$ -test, except for **B** and **I** middle panel which are analyzed with Mann-Whitney test because the data are not distributed normally.

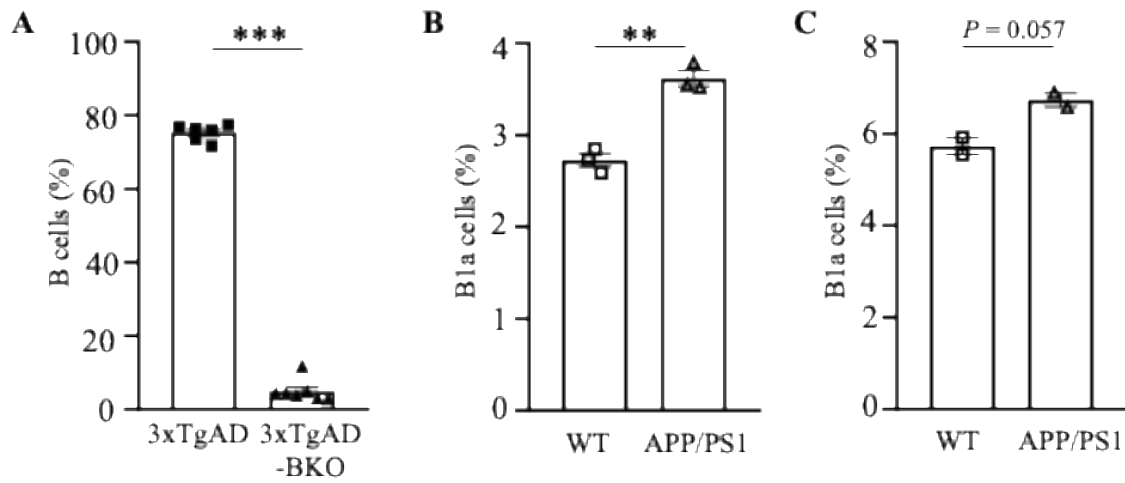

**Supplementary Figure 2. B cells in the circulation of AD mice.** 3xTgAD-BKO mice do not have circulating B cells (shown a representative data from peripheral blood, **A**). As in 3xTgAD mice, APP/PS1 mice also increased B1a cells in the blood (**B**) and cervical lymph nodes (**C**) as compared to age- and sex-matched WT littermates. Shown is Mean  $\pm$  SEM, where each symbol is for a single mouse. Gating strategy is shown in Suppl. Fig. 9A. \*\*  $P < 0.01$ ; \*\*\*  $P < 0.001$  in unpaired  $t$ -test.

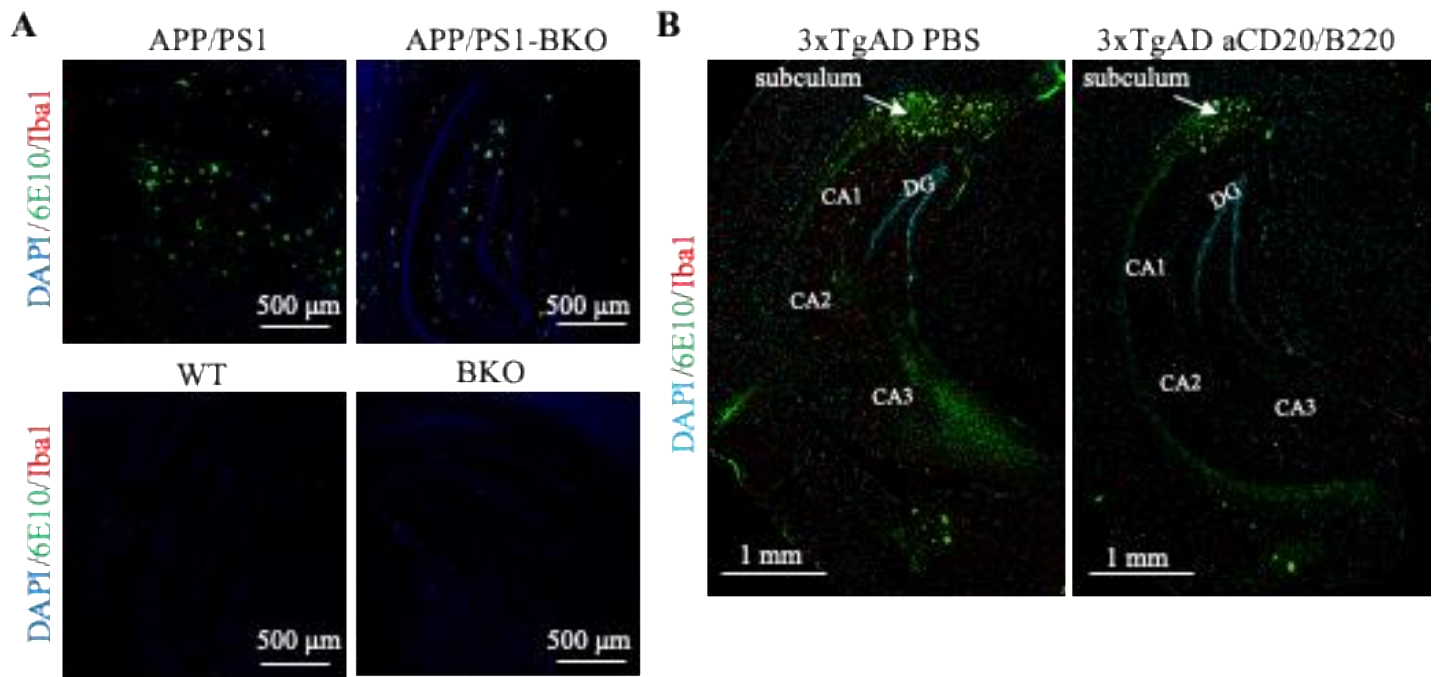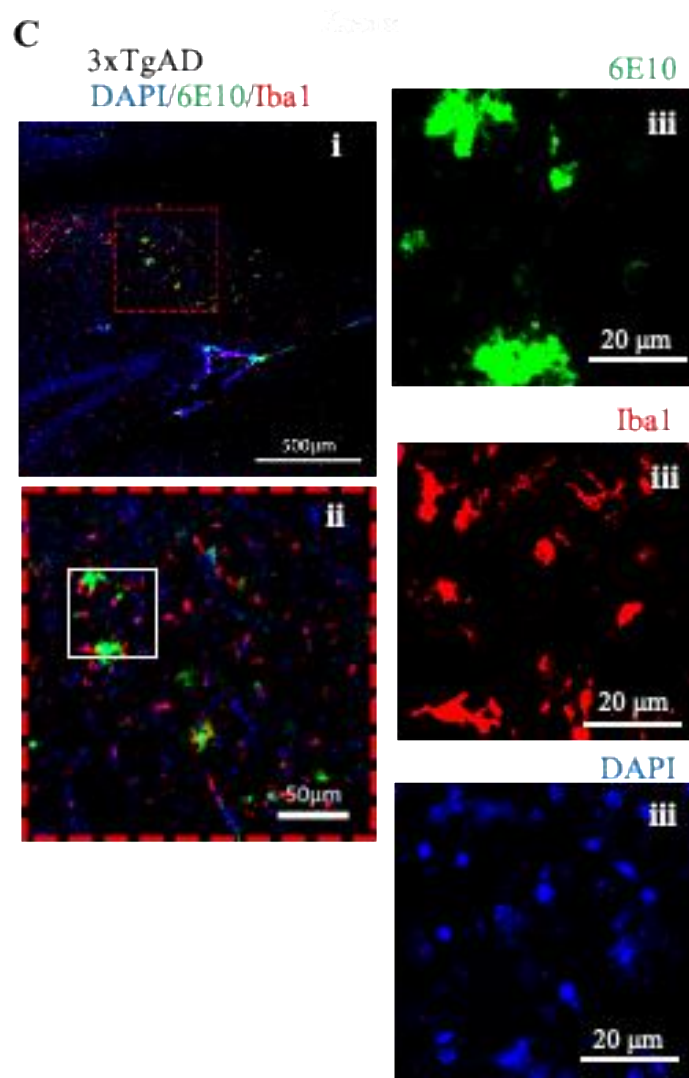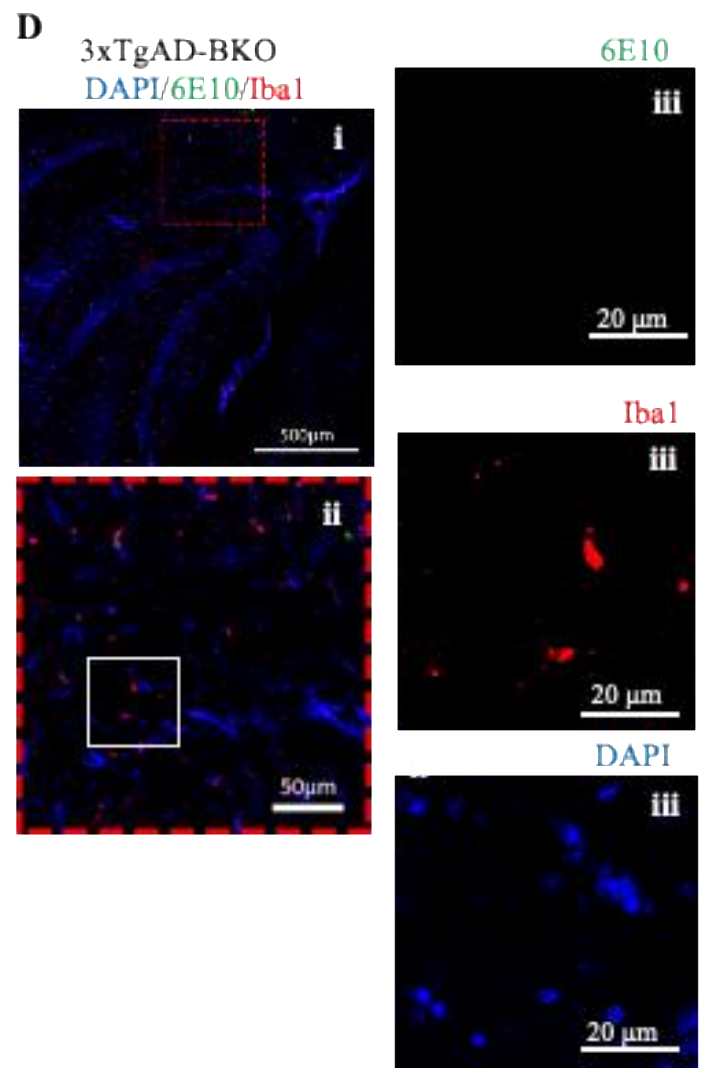

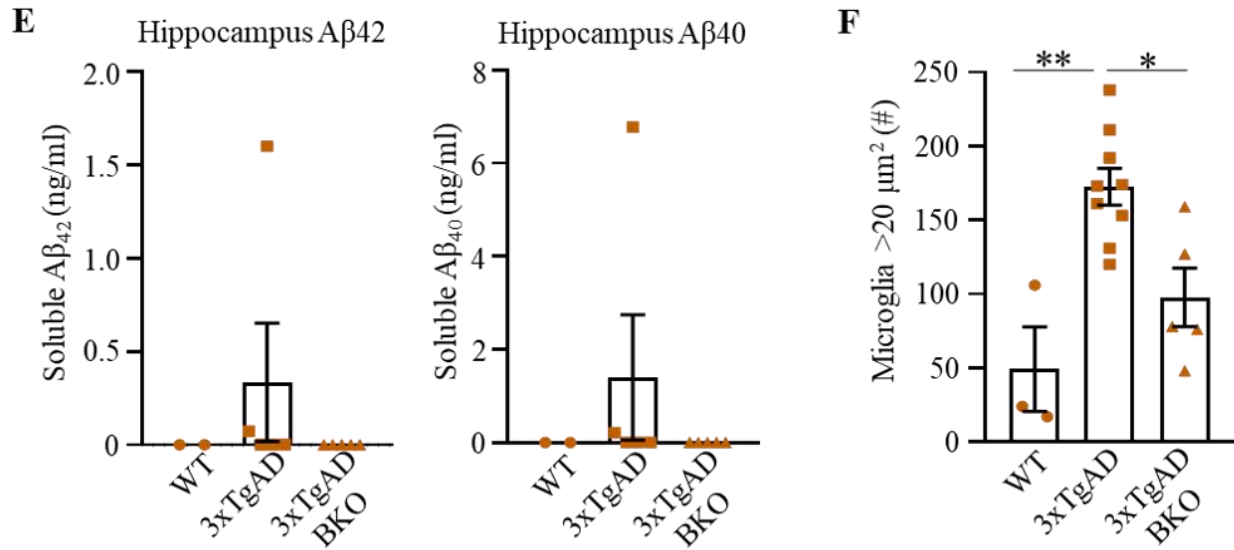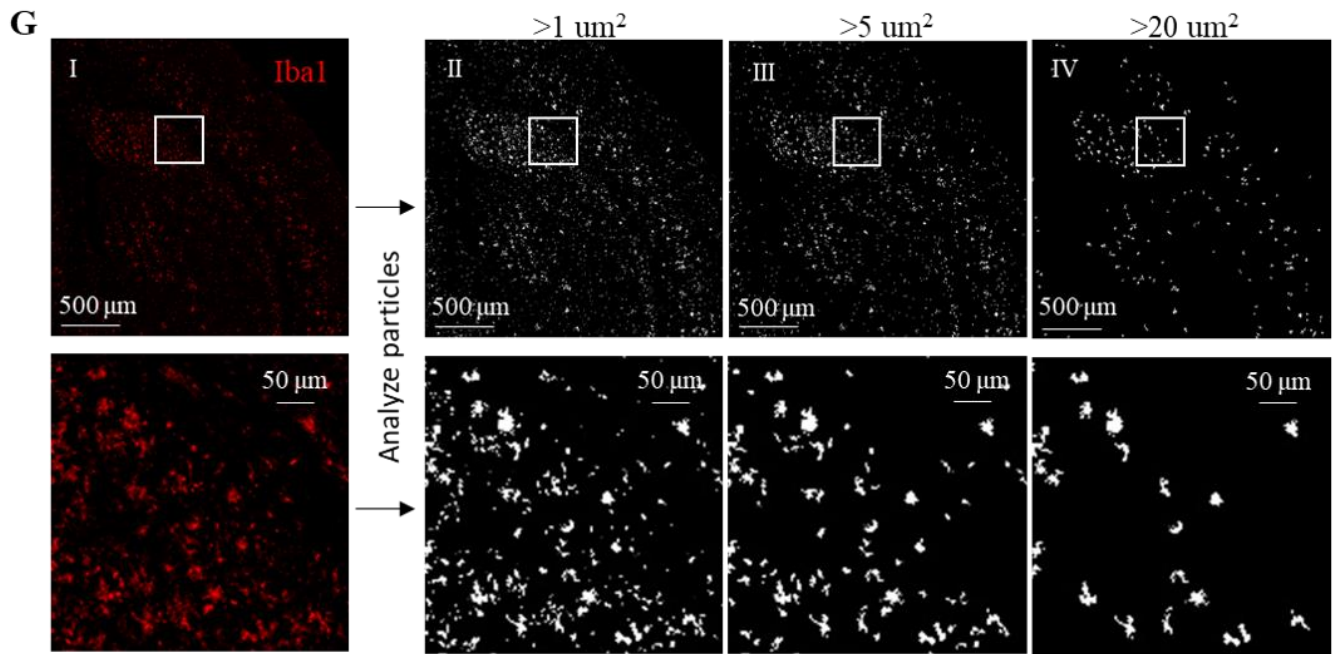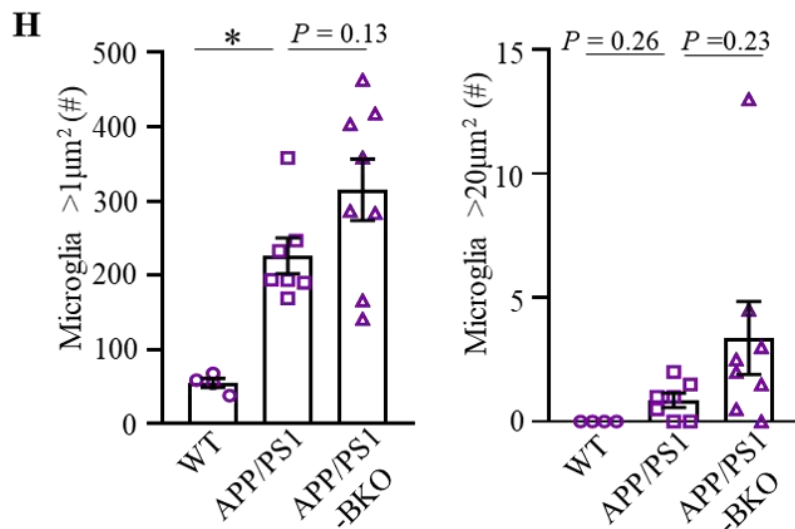

**Supplementary Figure 3. The loss of B cells reverses A $\beta$  plaque burden and microglial activation in the hippocampus.**

Compared with APP/PS1 mice, APP/PS1-BKO mice markedly reduced A $\beta$  plaques (green, scale, 500  $\mu$ m, **A**). In 3xTgAD mice, both B-cell depletion with anti-CD20/B220 antibody (**B**) or genetic B-cell deficiency (**C**, **D**) decreased A $\beta$  plaques in the hippocampus. Shown are A $\beta$  plaques (green, **B-D**), Iba1<sup>+</sup> microglia in the subiculum (red, **C** and **D**), and DAPI (blue, **A-D**). Arrows in **B** show the subiculum area, where A $\beta$  plaques and Iba1<sup>+</sup> microglia were quantified. In **C** and **D**, the enlarged images in red square (**i**) are shown in **ii** where white square is for the enlarged images in **iii**. The increased presence of soluble A $\beta$ <sub>1-40</sub> and A $\beta$ <sub>1-42</sub> peptides in the hippocampal lysates of 3xTgAD mice was lost in 3xTgAD-BKO mice (measured with ELISA, n=2-6, **E**). Larger-sized microglia (>20  $\mu$ m<sup>2</sup>) increased in the hippocampus of 3xTgAD mice as compared with age- and sex-matched 3xTgAD-BKO and WT mice (**F**). A representative strategy for quantification of microglia of different sizes is shown in **G** (see the Material and Methods section), the single channel of Iba1 image (**I**) were converted into 8-bit image, after proper threshold was set, “analyze particles” function was used for quantifying microglia with size above 1  $\mu$ m<sup>2</sup> (**II**), 5  $\mu$ m<sup>2</sup> (**III**) or 20  $\mu$ m<sup>2</sup> (**IV**). The white squares are for enlarged images shown in lower panels. Unlike 3xTgAD mice, B-cell deficiency in APP/PS1 mice did not affect numbers of microglia (small size, >1  $\mu$ m<sup>2</sup>; and large size, >20  $\mu$ m<sup>2</sup>, **H**). Shown is Mean  $\pm$  SEM (**E,F**, and **H**) \*  $P < 0.05$ ; \*\*  $P < 0.01$  in one-way ANOVA (**F**, **H** left) or Kruskal-Wallis test (**H** right).

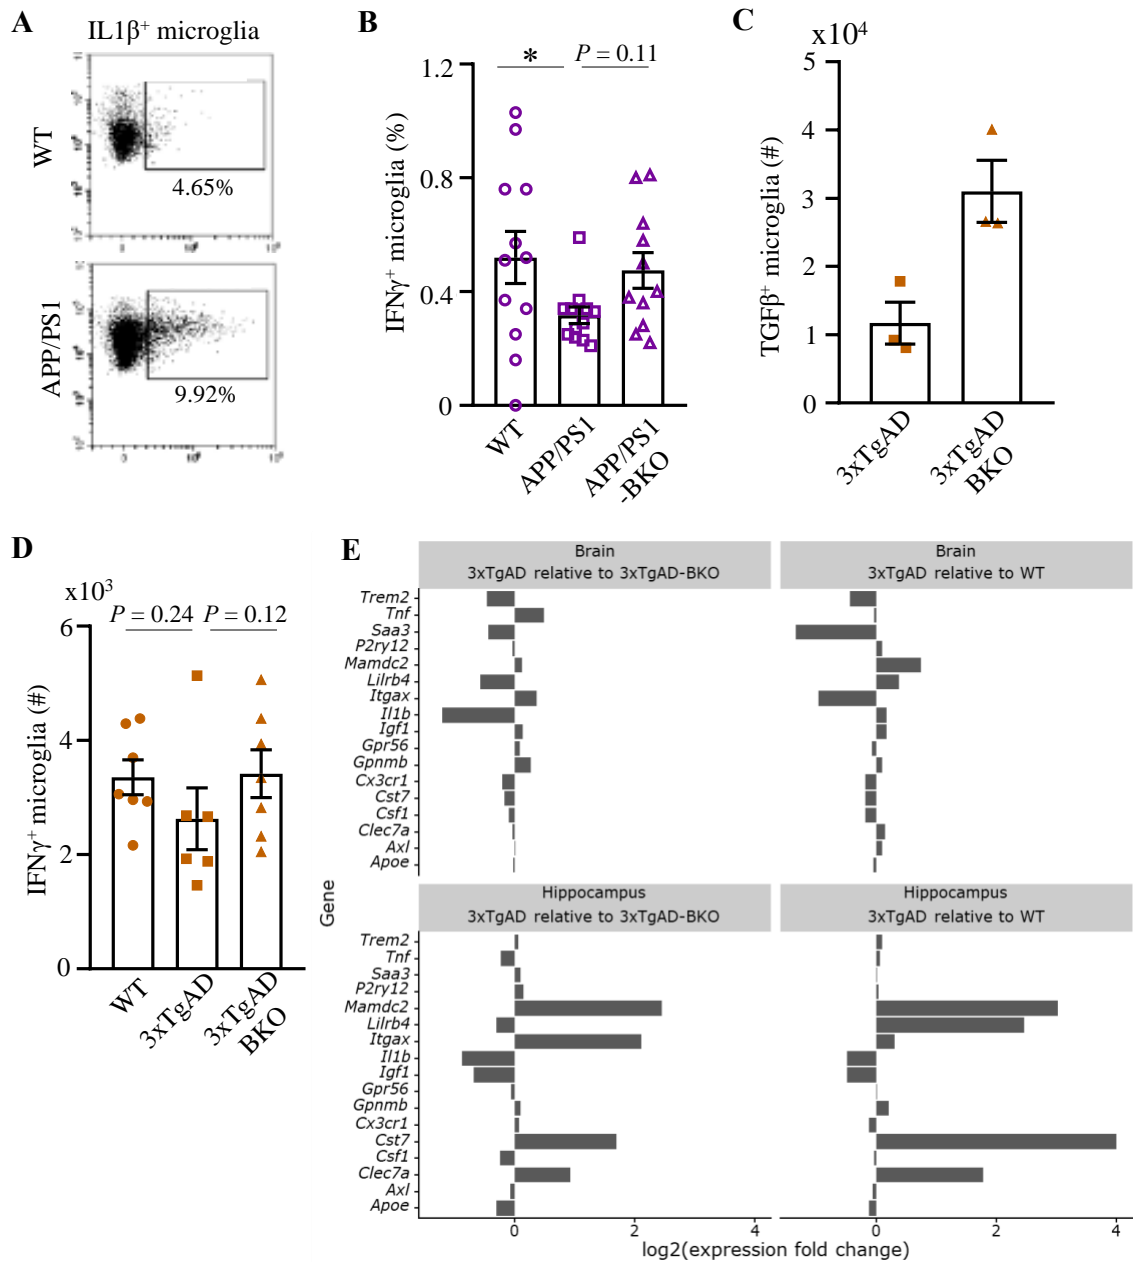

#### Supplementary Figure 4. B-cell deficiency restores resting microglia in AD mice.

Representative dot plots show upregulation of IL1 $\beta$  in microglia (gated in CD45<sup>Int</sup>CD11b<sup>+</sup>) in the brain of female APP/PS1 mice as compared to WT mice (A). The B-cell deficiency in AD mice increased IFN $\gamma$ <sup>+</sup> microglia in APP/PS1 mice (B) and TGF $\beta$ <sup>+</sup> microglia in 3xTgAD mice (C and D). RNA microarray analyses revealed that the B-cell deficiency differentially affects expression of DAM-associated genes in the brain (left) and hippocampus (right panel, n=2-3). Shown is Mean  $\pm$  SEM (B-D) and log<sub>2</sub> fold-change in 3xTgAD as compared with 3xTgAD-BKO and WT, E). Gating strategy is shown in Suppl. Fig. 9B. \*  $P < 0.05$ ; in one-way ANOVA (B, D) or Mann-Whitney test (C).



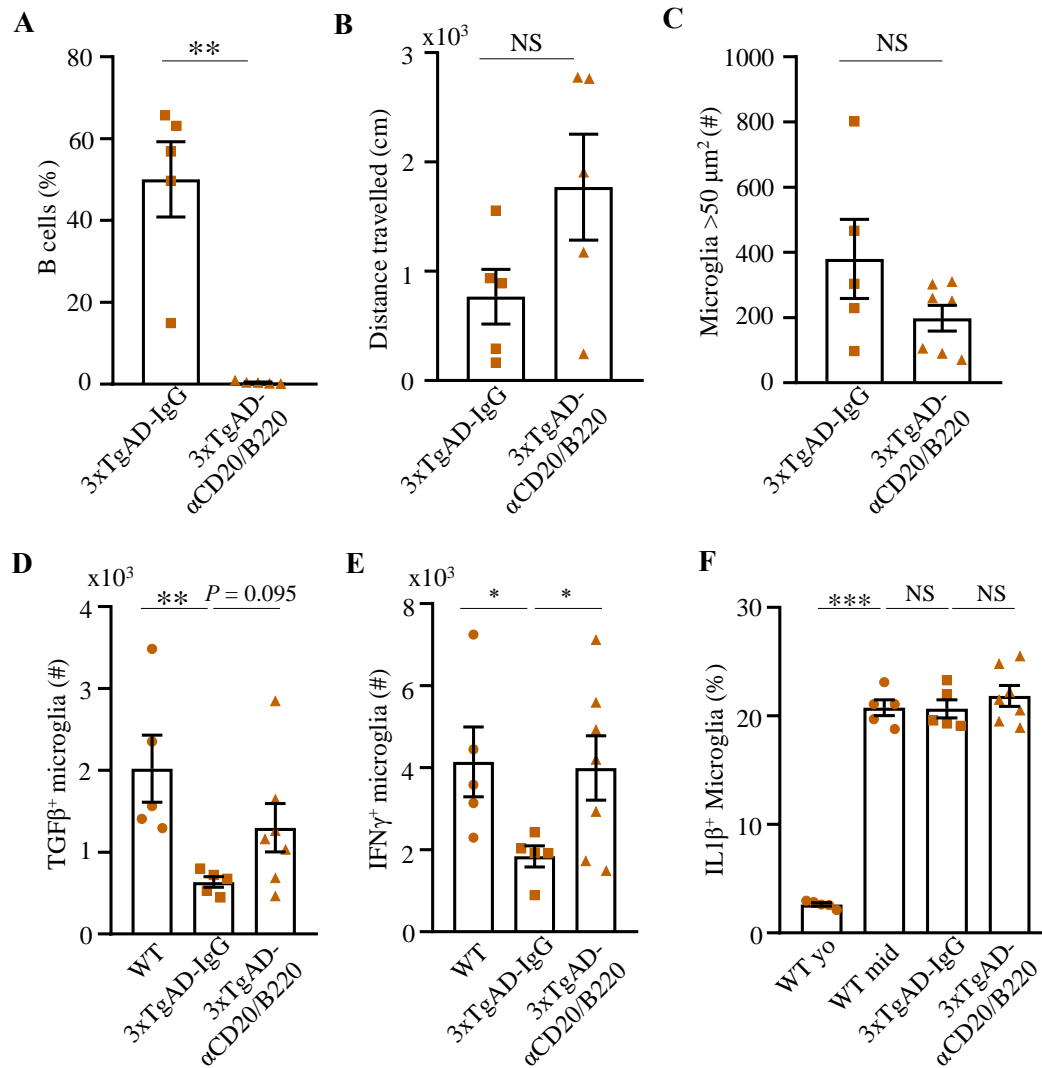

**Supplementary Figure 5. The therapeutic benefits of B cell depletion in 3xTgAD mice.** A 2-month i.p. treatment with anti-CD20/B220 antibody significantly depleted B cells in the circulation of 3xTgAD mice (A). Controls were injected with isotype-matched IgG. Open field test revealed that the B-cell depletion improved their locomotion, as shown by the increase of the total distance travelled (in duration of 30 min, B). B-cell depletion did not affect total number of large-sized microglia ( $> 50 \mu\text{m}^2$ , C); however, it reversed the loss of TGF $\beta^+$  (D) and IFN $\gamma^+$  (E) microglia in 3xTgAD mice without affecting IL1 $\beta$  expression (F). Shown is Mean  $\pm$  SEM with each symbol is for a single mouse. Gating strategy is shown in Suppl. Fig. 9A, B. \*\*  $P < 0.01$ ; \*\*\*  $P < 0.001$  in Mann-Whitney test (A), unpaired  $t$ -test (B, C), Kruskal-Wallis test (D) or one-way ANOVA (E, F).

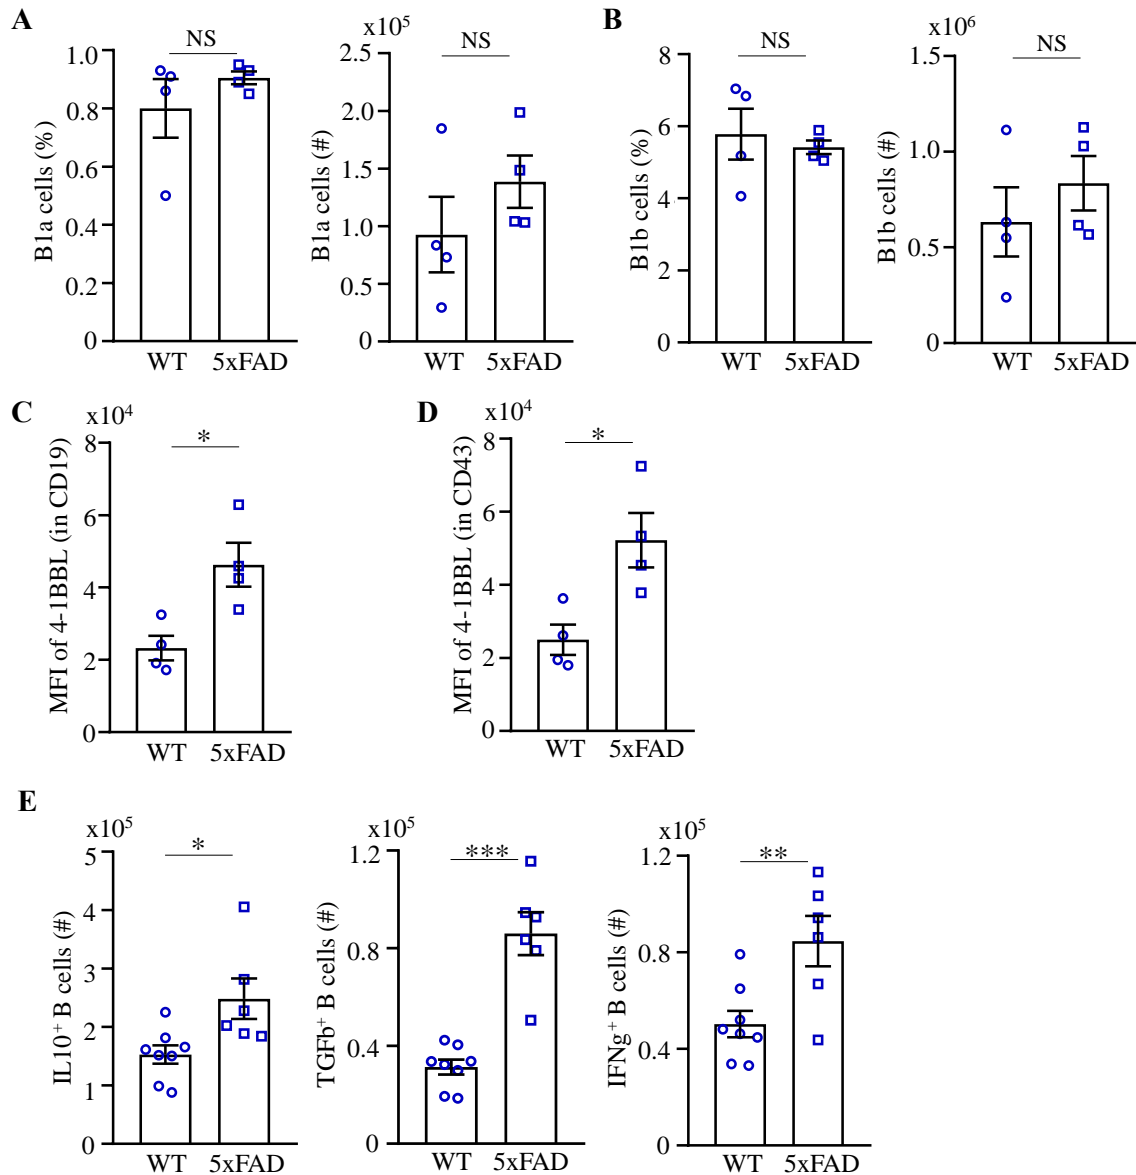

**Supplementary Figure 6. B cells are activated in 5xFAD mice.** Compared with age- and sex-matched WT mice, the frequency and the number of B1a (**A**) and B1b (**B**) cells are not changed in the spleen of 5xFAD mice. However, 5xFAD mice upregulated both B cells (CD19<sup>+</sup>, **C**) and B1 cells (CD43<sup>+</sup>CD19<sup>+</sup>, **D**) expressing 4-1BBL (MFI) as compared with control WT mice. Moreover, 5xFAD mice upregulated B cells expressing IL10 (left), TGFβ (middle), and IFNγ (right panel, **E**), suggesting that AD activates B cells. Shown is Mean ± SEM with each symbol is for a single mouse. Gating strategy is shown in Suppl. Fig. 9A. \*  $P < 0.05$ ; \*\*  $P < 0.01$ ; \*\*\*  $P < 0.001$  in unpaired  $t$ -test.

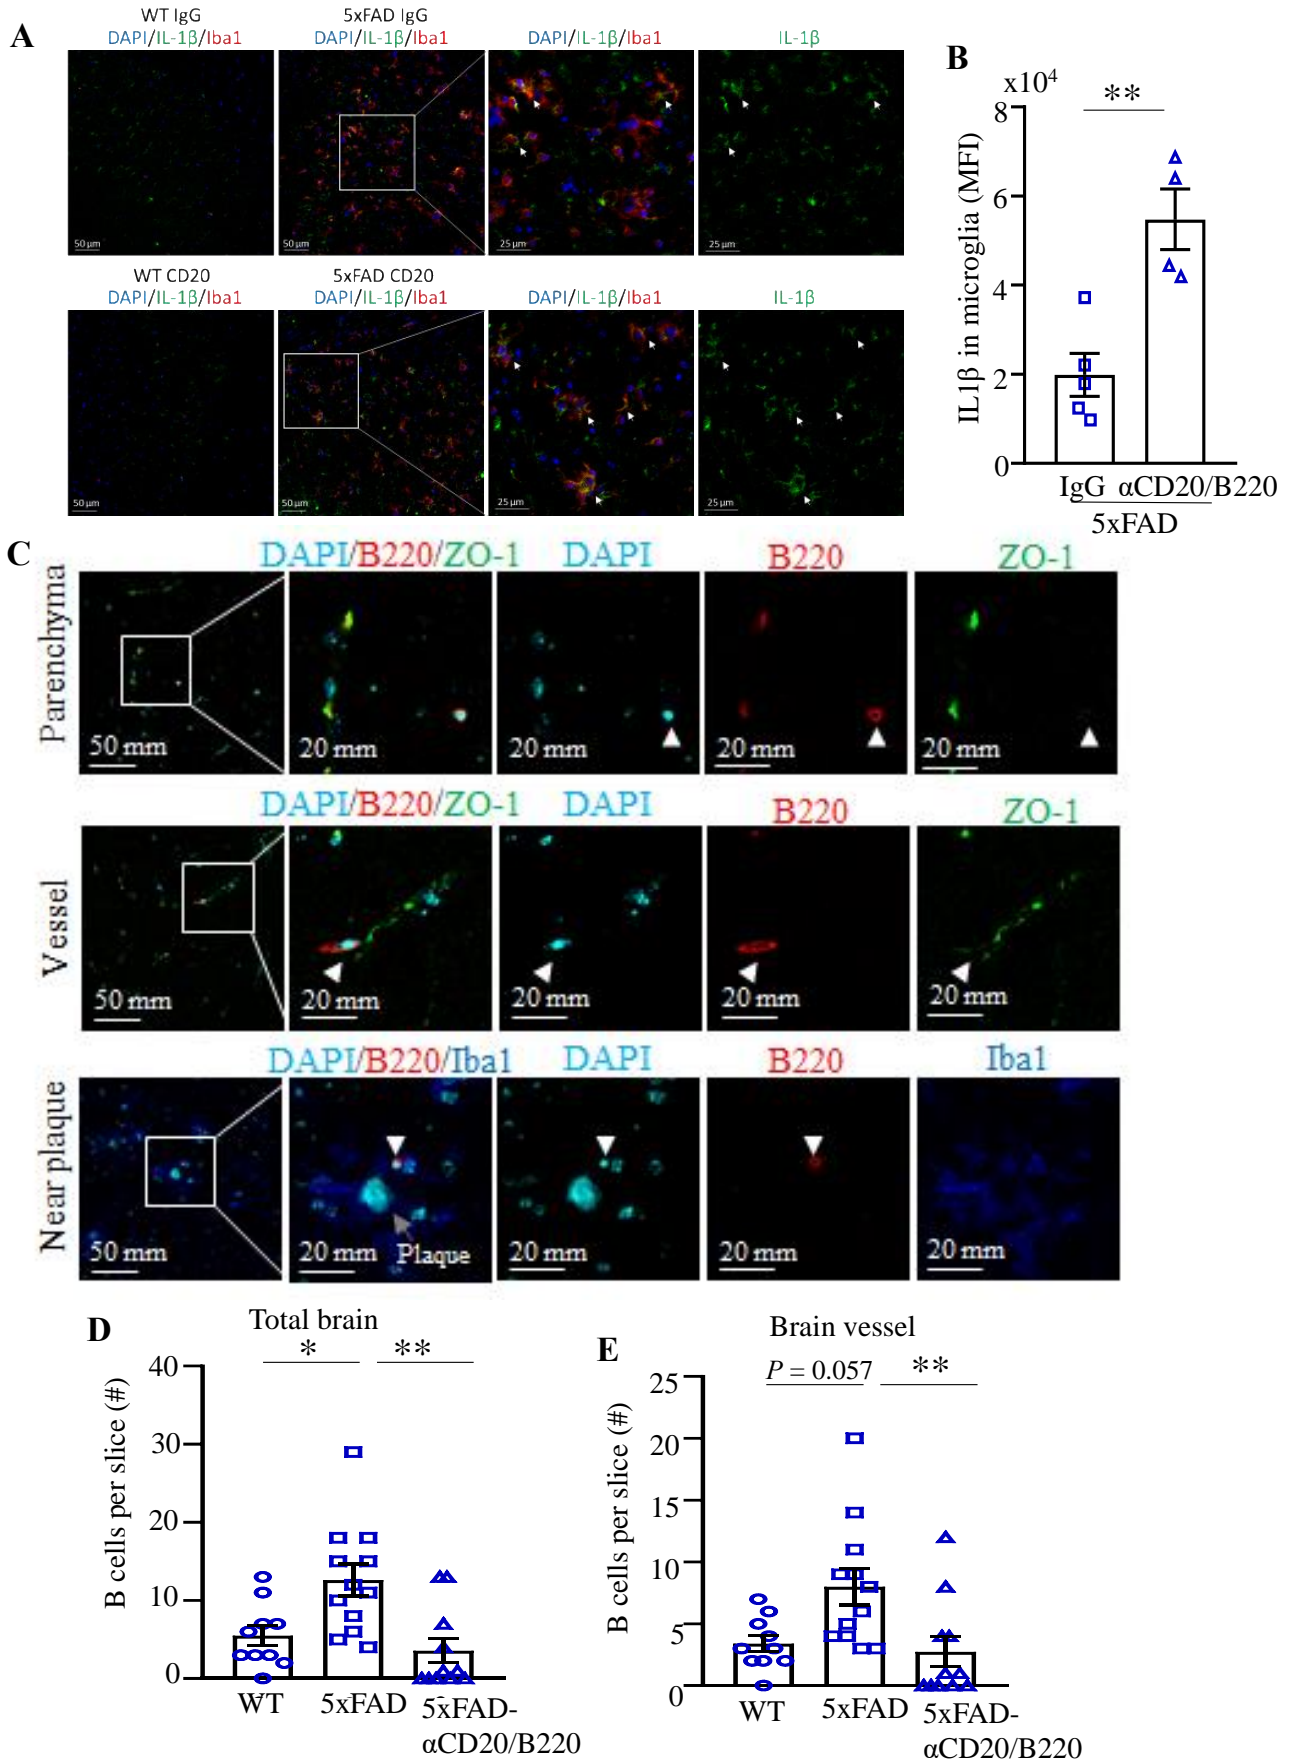

**Supplementary Figure 7. Immunofluorescent staining of IL1 $\beta$ <sup>+</sup> microglia and B220<sup>+</sup> B cells in the brain of female 5xFAD mice.** The representative image of IL1 $\beta$  expression in the subiculum (IL1 $\beta$ , green; and Iba1<sup>+</sup> microglia, red; the arrow heads are for IL1 $\beta$  co-localized with Iba1<sup>+</sup> microglia, **A**) and the quantification of IL1 $\beta$  intensity in Iba1<sup>+</sup> microglia (n=4-5, **B**). B cells were found markedly increased in the brain parenchyma of 5xFAD mice as compared with WT mice (**C**). Immune fluorescent staining shows B220<sup>+</sup> B cells in the brain parenchyma (upper panels), within vessels (middle panels) and near plaques (bottom panels, **C**). Quantification of B220<sup>+</sup> B cells in the whole brain parenchyma and in the brain vessels is in **D** and **E**, respectively (n=10-12). In **B**, **D** and **E**, shown is Mean  $\pm$  SEM; each symbol is for a single mouse. \*  $P < 0.05$ ; \*\*  $P < 0.01$  in unpaired  $t$ -test (**B**) or Kruskal-Wallis test (**D-E**).

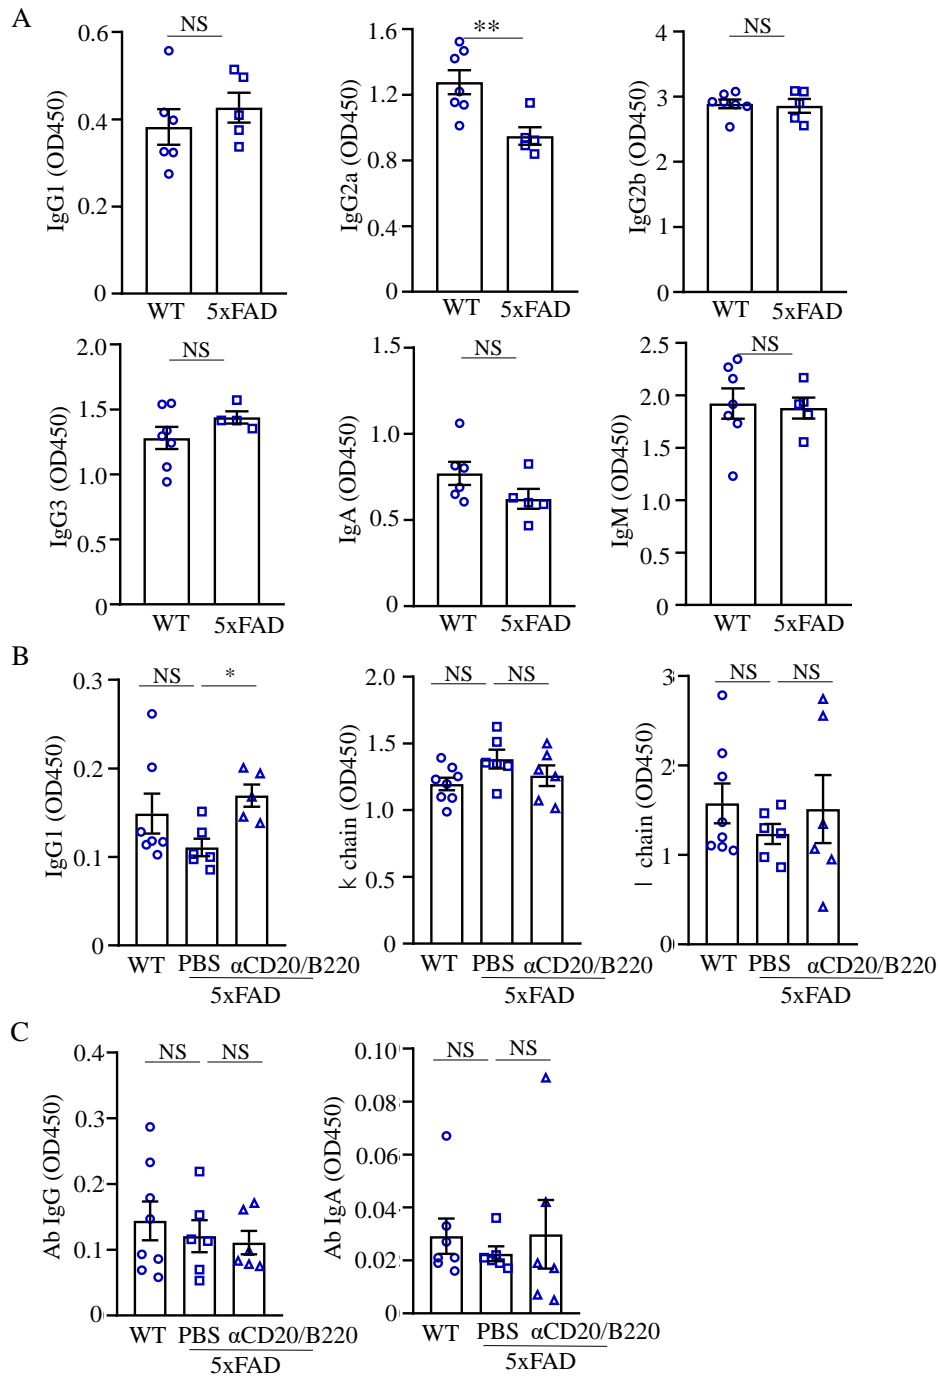

**Supplementary Figure 8. Transient B-cell depletion in 5xFAD mice does not affect the levels of immunoglobulin in circulation.** In A, shown is ELISA quantification of IgG1, IgG2a, IgG2b, IgG3, IgA and IgM in sera of 5xFAD mice as compared with WT mice. Compared with control, a 2-month B-cell depletion (5xFAD- $\alpha$ CD20/B220) did not affect serum levels of IgG1,  $\kappa$  chain and  $\lambda$  chain Igs (B). 5xFAD did not have a tangible amount of A $\beta$ -specific antibody in the circulation (C). Shown is Mean  $\pm$  SEM; each symbol is for a single mouse. Statistical analyses are conducted with unpaired *t*-test (A), Kruskal-Wallis test (B left) or one-way ANOVA (middle and right in B, and C).

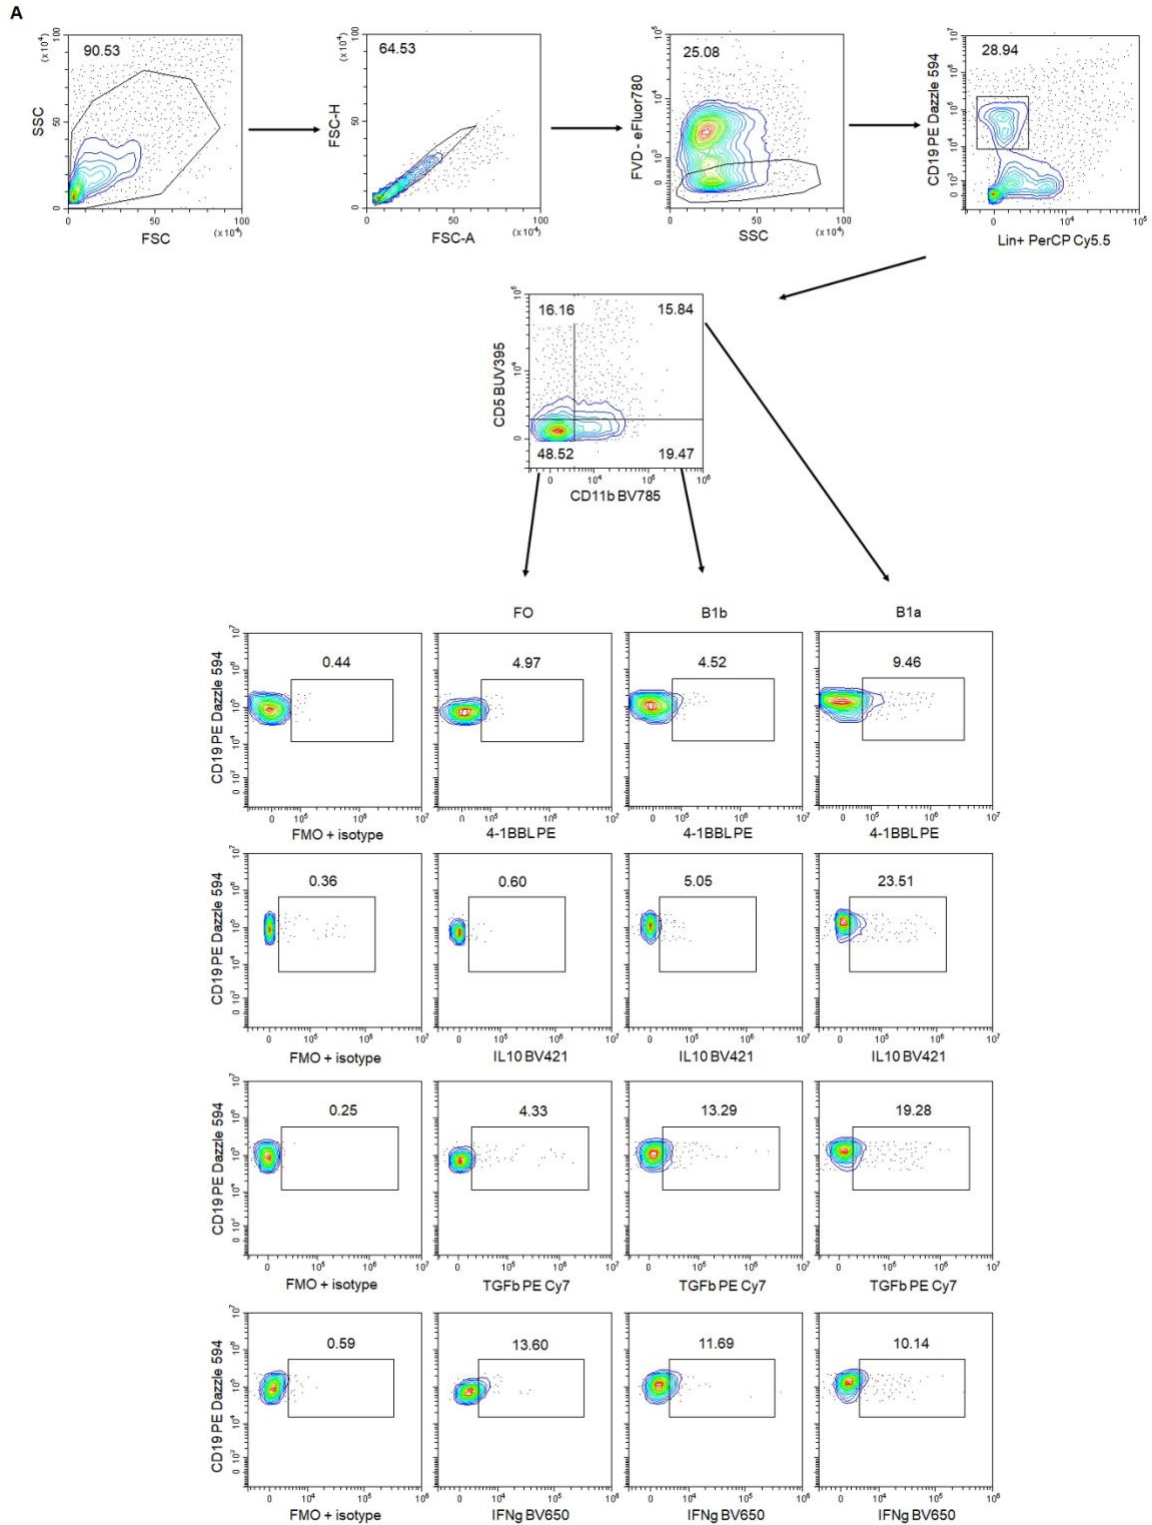

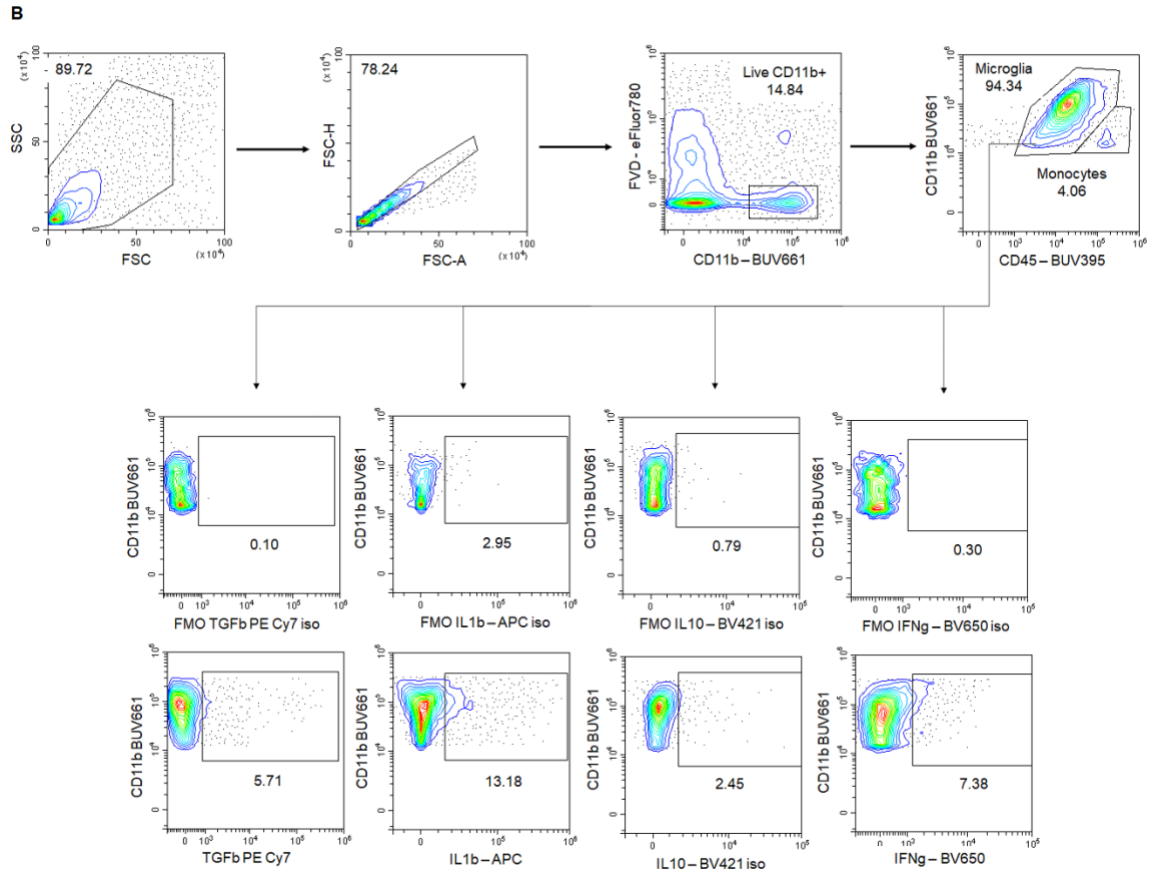

**Supplementary Figure 9. Gating strategy used in the study to determine the percentage of cytokine expressing B-cell subsets (A, depicted in Fig. 1A-G, Fig. 2C, Suppl. Fig. 1A-J, Suppl. Fig. 2A-C, Suppl. Fig. 5A, Suppl. Fig. 6A-E) and microglia (B, depicted in Fig. 4A-C, G; Fig. 5E-F; Suppl. Fig. 4A-D and Suppl. Fig. 5D-F).**
