# Supplementary material for: Therapeutic B-cell depletion reverses progression of Alzheimer’s disease
Source: PubMed Central journal article supplement (PMC8042032; doi:10.1038/s41467-021-22479-4), 2021-04-12
Supplement: 41467_2021_22479_MOESM3_ESM.pdf [file 41467_2021_22479_MOESM3_ESM.pdf]

## **Description of Additional Supplementary Files**

File Name: Supplementary Data 1

Description: List of AD-related gene expression level from total mouse brain

File Name: Supplementary Data 2

Description: Top 100 genes changed in hippocampus of 3xTgAD vs 3xTgAD-BKO, female

File Name: Supplementary Data 3

Description: Top 100 genes changed in brain of 3xTgAD vs 3xTgAD-BKO, female

File Name: Supplementary Data 4

Description: List of antibody used in flow cytometry analysis
